# Supplementary material for: Aggregated coordination polymers of Ag+ with a cysteine derivative ligand containing an AIEgen
Source: Royal Society of Chemistry journal article supplement (doi:10.1039/d3cc00474k), 2023-01-01
Supplement: d3cc00474k1.pdf [file d3cc00474k1.pdf]

## Electronic Supplementary Information (ESI)

### Aggregated Coordination Polymers of Ag<sup>+</sup> with a Cysteine Derivative Ligand Containing an AI Egen

Jing-Jing Quan, Qian Wang, Zhao Li and Yun-Bao Jiang\*

*Department of Chemistry, College of Chemistry and Chemical Engineering, the MOE Key Laboratory of Spectrochemical Analysis and Instrumentation, and iChEM, Xiamen University, Xiamen 361005, China*

*E-mail: ybjjiang@xmu.edu.cn*

#### TABLE OF CONTENTS

|                                                                                              |           |
|----------------------------------------------------------------------------------------------|-----------|
| <b>S1. Experimental Section</b> .....                                                        | <b>2</b>  |
| <b>S1.1 Materials and Reagents</b> .....                                                     | <b>2</b>  |
| <b>S1.2 Physical Measurements and Instruments</b> .....                                      | <b>2</b>  |
| <b>S2. Synthetic Details</b> .....                                                           | <b>2</b>  |
| <b>S2.1 Synthesis</b> .....                                                                  | <b>2</b>  |
| <b>S2.2 References</b> .....                                                                 | <b>6</b>  |
| <b>S3. Additional Data</b> .....                                                             | <b>6</b>  |
| <b>S3.1 Experimental Data</b> .....                                                          | <b>6</b>  |
| <b>S3.2 <sup>1</sup>H NMR and <sup>13</sup>C NMR Spectra and HRMS of New Compounds</b> ..... | <b>24</b> |

## S1. Experimental Section

### S1.1 Materials and Reagents

All reagents of analytical grade were used without further purification. (4-Ethoxycarbonylphenyl) boronic acid, 1-(4-bromophenyl)-1,2,2-triphenylethylene, Tetrakis(triphenylphosphine)palladium, 1-(4-carboxyphenyl)-1,2,2-triphenylethene, triethylamine (NEt<sub>3</sub>), 1-hydroxybenzotriazole (HOBT), and *N, N'*-dicyclohexylcarbodiimide (DCC) were purchased from Energy Chemical. K<sub>2</sub>CO<sub>3</sub> (>98%), KOH (>99%), AgNO<sub>3</sub> (>99%) and Na<sub>2</sub>SO<sub>4</sub> (>99%) were purchased from Sinopharm Chemical Reagent Co., Ltd. L- and D-Cysteine ethyl ester hydrochloride (L-/D-CysOEt·HCl) were obtained from GL Biochem (Shanghai, China).

### S1.2 Physical Measurements and Instruments

<sup>1</sup>H NMR and <sup>13</sup>C NMR spectra were recorded on a Bruker Ascend III NMR Spectrometer (600 or 850 MHz) using Si(CH<sub>3</sub>)<sub>4</sub> as an internal standard. High-resolution mass spectrometry (HRMS) data were acquired on a Bruker Impact II spectrometer and Bruker autoflex maX MALDI-TOF MS, UV-Vis absorption spectra were collected on Varian Cary 300 UV spectrophotometer. CD spectrometry was conducted on JASCO J-810 Circular Dichroism Chiroptical Spectrometer. Emission spectra were obtained from a HITACHI F-4500 spectrofluorometer. Dynamic light scattering (DLS) data were collected on a Malvern Nano S90 Malvern Zetasizer Nano ZS. TEM images were taken on a JEM 1400 Transmission Electron Microscope with an accelerating voltage of 100 kV. Scanning electron microscopy (SEM) images were obtained using a Hitachi S-4800 microscope.

## S2. Synthetic Details

### S2.1 Synthesis

Synthesis of compound **TPE-Ph-COOH**. This was synthesized according to a modified procedure described in the literature for a related compound.<sup>1,2</sup> Briefly, 1-(4-

bromophenyl)-1,2,2-triphenylethylene (1.23 g, 3 mmol), (4-ethoxycarbonylphenyl)-boronic acid (0.63 g, 3 mmol), K<sub>2</sub>CO<sub>3</sub> (0.84 g, 9 mmol), and dry toluene (25 mL) were added to a 100 mL 2-necked round flask. The mixture was bubbled with nitrogen for 30 min and equipped with a water condenser. Tetrakis(triphenylphosphine)palladium (0.03 g) was then added to the reaction mixture and stirred at 80 °C for 24 h under nitrogen. After the completion of reaction, monitored by TLC, the precipitates were removed and filtrate was collected. The obtained crude product was purified by silica gel column chromatography eluting with 3:1 (v/v) petroleum ether/dichloromethane to afford a bright yellow solid (0.94 g, 75%). The target molecule was obtained by hydrolyzing of the ethyl ester group. Then the ester was dissolved in THF (20 mL) and H<sub>2</sub>O (20 mL) containing KOH (4.45 g) and the solution was refluxed for 4 h. After cooling, the solvent was evaporated and water (10 mL) and 5 N HCl solution were added to adjust solution pH to 3. The precipitate was filtered, washed with water, and dried to give the product **TPE-Ph-COOH** (96%, 1.03 g). <sup>1</sup>H NMR (600 MHz, DMSO-*d*<sub>6</sub>, 298 K): δ (ppm) = 12.96 (s, 1H), 7.97 (d, *J* = 8.3 Hz, 2H), 7.75 (d, *J* = 8.4 Hz, 2H), 7.55 (d, *J* = 8.3 Hz, 2H), 7.20 - 6.96 (m, 17H). <sup>13</sup>C NMR (151 MHz, DMSO-*d*<sub>6</sub>, 298 K): δ (ppm) = 167.16 (s), 143.52 (s), 143.33 (s), 143.26 - 142.97 (m), 141.11 (s), 140.02 (s), 136.77 (s), 131.48 (s), 130.89 - 130.55 (m), 130.03 (s), 129.59 (s), 128.14 - 127.79 (m), 126.92 - 126.64 (m), 126.54 (s), 126.30 (s), 54.98 (s). HRMS (ESI<sup>-</sup>): calcd. for [M-H]<sup>-</sup>, 451.1704. Found: 451.1707.

Synthesis of compound L-1 or D-1: 1.03 g **TPE-Ph-COOH** was dispersed in CHCl<sub>3</sub> under an ice bath, to which 2.5 mL triethylamine, 1-hydroxybenzotriazole (0.32 g, 2.4 mmol) and *N, N'*-dicyclohexylcarbodiimide (0.49 g, 2.4 mmol) were added and the mixture was stirred at 0°C for 40 min. A CHCl<sub>3</sub> solution (10 mL) of L- or D-cysteine ethyl ester hydrochloride (0.37 g, 2.0 mmol) was then added dropwise and the resultant solution was stirred at room temperature for 8 h. The solvent was removed by rotary evaporation, leading to an oily liquid. A saturated aqueous NaHCO<sub>3</sub> solution (30 mL) was added and the mixture was extracted with CH<sub>2</sub>Cl<sub>2</sub>

(DCM, 3×25 mL). The combined organic layers were dried over anhydrous Na<sub>2</sub>SO<sub>4</sub>, filtered and concentrated. The crude product was purified by column chromatography on silica gel, leading to a bright yellow solid.

**L-1:** Yield: 979 mg (1.68 mmol, 74 %). **<sup>1</sup>H NMR** (600 MHz, DMSO-*d*<sub>6</sub>, 298 K): δ (ppm) = 8.82 (d, *J* = 7.6 Hz, 1H), 7.95 (d, *J* = 8.2 Hz, 2H), 7.76 (d, *J* = 8.2 Hz, 2H), 7.56 (d, *J* = 8.2 Hz, 2H), 7.19 - 6.98 (m, 17H), 4.64 - 4.47 (m, 1H), 4.14 (ddd, *J* = 9.9, 7.5, 3.3 Hz, 2H), 3.05 - 2.96 (m, 1H), 2.95 - 2.86 (m, 1H), 2.68 (t, *J* = 8.5 Hz, 1H), 1.20 (t, *J* = 7.1 Hz, 3H). **<sup>13</sup>C NMR** (151 MHz, DMSO-*d*<sub>6</sub>, 298 K): δ (ppm) = 170.41 (s), 166.22 (s), 143.29 - 142.94 (m), 142.27 (s), 140.96 (s), 139.98 (s), 136.80 (s), 132.31 (s), 131.39 (s), 130.88 - 130.49 (m), 128.15 (s), 128.07 - 127.72 (m), 126.89 - 126.36 (m), 126.19 (d, *J* = 8.4 Hz), 60.82 (s), 55.67 (s), 25.00 (s), 14.07 (s). **HRMS (ESI<sup>+</sup>)**: calcd. for [M+H]<sup>+</sup>, 584.2254, [M+Na]<sup>+</sup>, 606.2073. Found: 584.2255; 606.2077.

**D-1:** Yield: 913 mg (1.56 mmol, 69%). **<sup>1</sup>H NMR** (600 MHz, DMSO-*d*<sub>6</sub>, 298 K): δ (ppm) = 8.83 (d, *J* = 7.5 Hz, 1H), 7.97 (d, *J* = 8.1 Hz, 2H), 7.76 (d, *J* = 8.2 Hz, 2H), 7.56 (d, *J* = 8.1 Hz, 2H), 7.17 - 6.98 (m, 17H), 4.59 (dd, *J* = 12.8, 8.2 Hz, 1H), 4.14 (dd, *J* = 6.9, 4.6 Hz, 2H), 3.05 - 2.98 (m, 1H), 2.92 (dd, *J* = 22.3, 8.7 Hz, 1H), 2.68 (t, *J* = 8.5 Hz, 1H), 1.20 (t, *J* = 7.1 Hz, 3H). **<sup>13</sup>C NMR** (151 MHz, DMSO-*d*<sub>6</sub>, 298 K): δ (ppm) = 170.41 (s), 166.23 (s), 143.09 (s), 142.28 (s), 140.96 (s), 139.98 (s), 136.81 (s), 132.32 (s), 131.40 (s), 130.89 - 130.50 (m), 128.16 (s), 128.07 - 127.66 (m), 126.89 - 126.35 (m), 126.19 (d, *J* = 8.7 Hz), 60.83 (s), 55.68 (s), 39.52 (s), 26.34 (s), 25.02 (s), 14.07 (s). **HRMS (ESI<sup>+</sup>)**: calcd. for [M+H]<sup>+</sup>, 584.2254, [M+Na]<sup>+</sup>, 606.2073. Found: 584.2256; 606.2080.

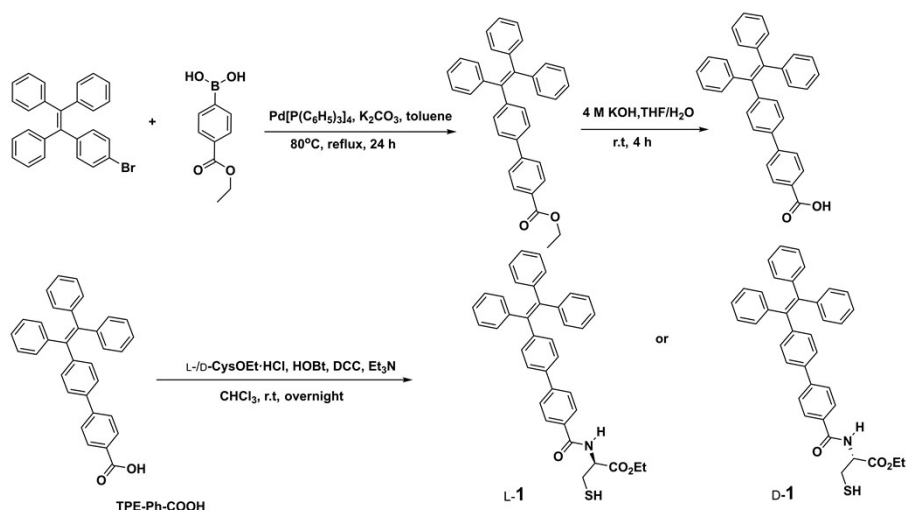

**Scheme S1.** Synthesis of compounds L-1 and D-1.

Synthesis of compound L-2: 1-(4-carboxyphenyl)-1,2,2-triphenylethene (0.72 g, 2.00 mmol) and triethylamine (2.5 mL) were added into CHCl<sub>3</sub> suspension (20 mL). The reaction mixture was cooled down to 0 °C, then, 1-hydroxybenzotriazole (0.32 g, 2.4 mmol) and *N,N'*-dicyclohexylcarbodiimide (0.49 g, 2.4 mmol) were added. After the addition was complete, the mixture was stirred at 0 °C for 40 min. Then, the mixture was added dropwise a CHCl<sub>3</sub> solution (10 mL) of L-cysteine ethyl ester hydrochloride (0.37 g, 2.00 mmol). After being stirred at room temperature for 8 h, the mixture was washed with diluted brine and saturated NaHCO<sub>3</sub>, and dried over anhydrous Na<sub>2</sub>SO<sub>4</sub>. The solvent was evaporated under reduced pressure and then purified by column chromatography on silica gel using dichloromethane- methanol (100:1, v/v) as eluent. A white solid was obtained after solvent removal under reduced pressure. Yield: 775 mg (1.52 mmol, 76%). <sup>1</sup>H NMR (600 MHz, DMSO-*d*<sub>6</sub>, 298 K): δ (ppm) = 8.70 (d, *J* = 6.8 Hz, 1H), 7.67 (d, *J* = 7.3 Hz, 2H), 7.19 - 6.97 (m, 17H), 4.52 (d, *J* = 3.3 Hz, 1H), 4.19 - 4.07 (m, 2H), 3.02 - 2.83 (m, 2H), 2.66 (t, *J* = 8.1 Hz, 1H), 1.19 (t, *J* = 6.4 Hz, 3H). <sup>13</sup>C NMR (151 MHz, DMSO-*d*<sub>6</sub>, 298 K): δ (ppm) = 170.38 (s), 166.21 (s), 146.66 (s), 142.79 (d, *J* = 19.6 Hz), 141.54 (s), 139.76 (s), 131.44 (s), 130.62 (d, *J* = 9.7 Hz), 128.21 - 127.71 (m), 127.12 (s), 126.80 (d, *J* = 19.0 Hz), 60.81 (s), 55.65 (s), 39.52 (s), 24.94 (s), 14.06 (s). HRMS (ESI<sup>+</sup>): calcd. for [M+H]<sup>+</sup>, 508.1941, [M+Na]<sup>+</sup>, 530.1760. Found: 508.1944; 530.1762.



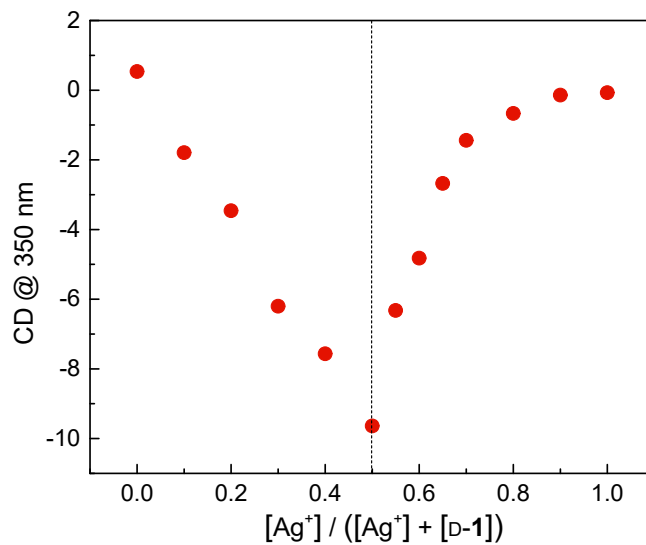

**Fig. S2** Job's plot establishing 1:1 stoichiometry of the binding of D-1 with Ag<sup>+</sup> using CD signal at 350 nm.

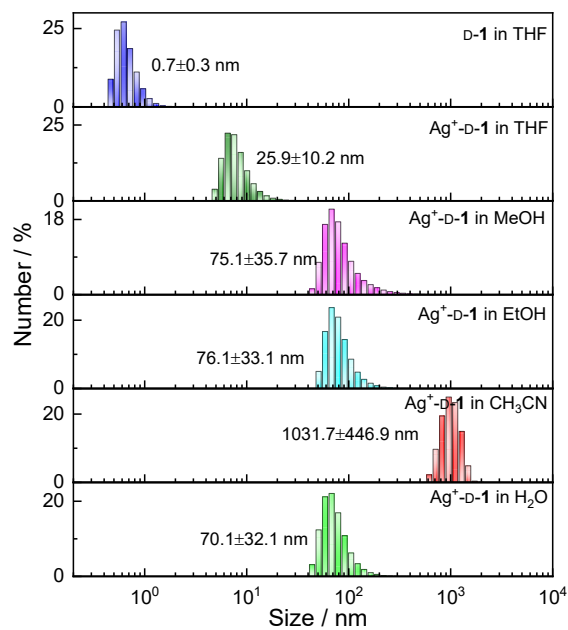

**Fig. S3** Dynamic light scattering analyses of size distributions of Ag<sup>+</sup>-D-1 coordination polymer in different solvents. [D-1] = [Ag<sup>+</sup>] = 25 μM.

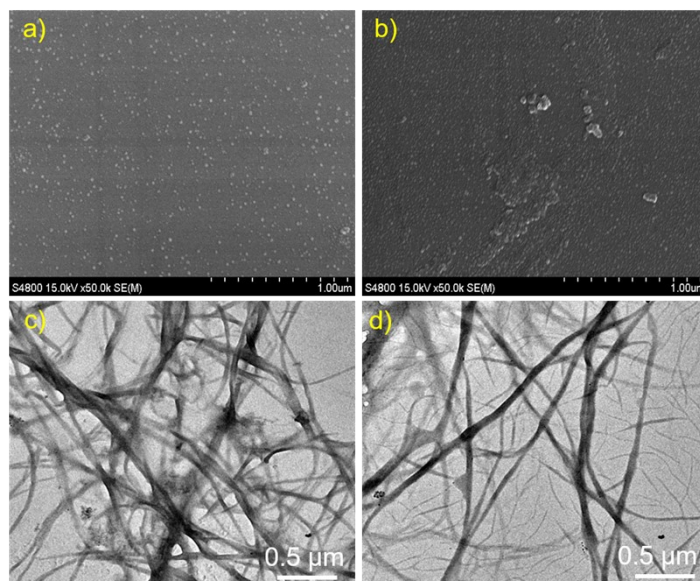

**Fig. S4** SEM (a, b) and TEM (c, d) images of supramolecular structures formed in THF solution of L-1 (a), D-1 (b), Ag<sup>+</sup>-L-1 (c) and Ag<sup>+</sup>-D-1 (d).

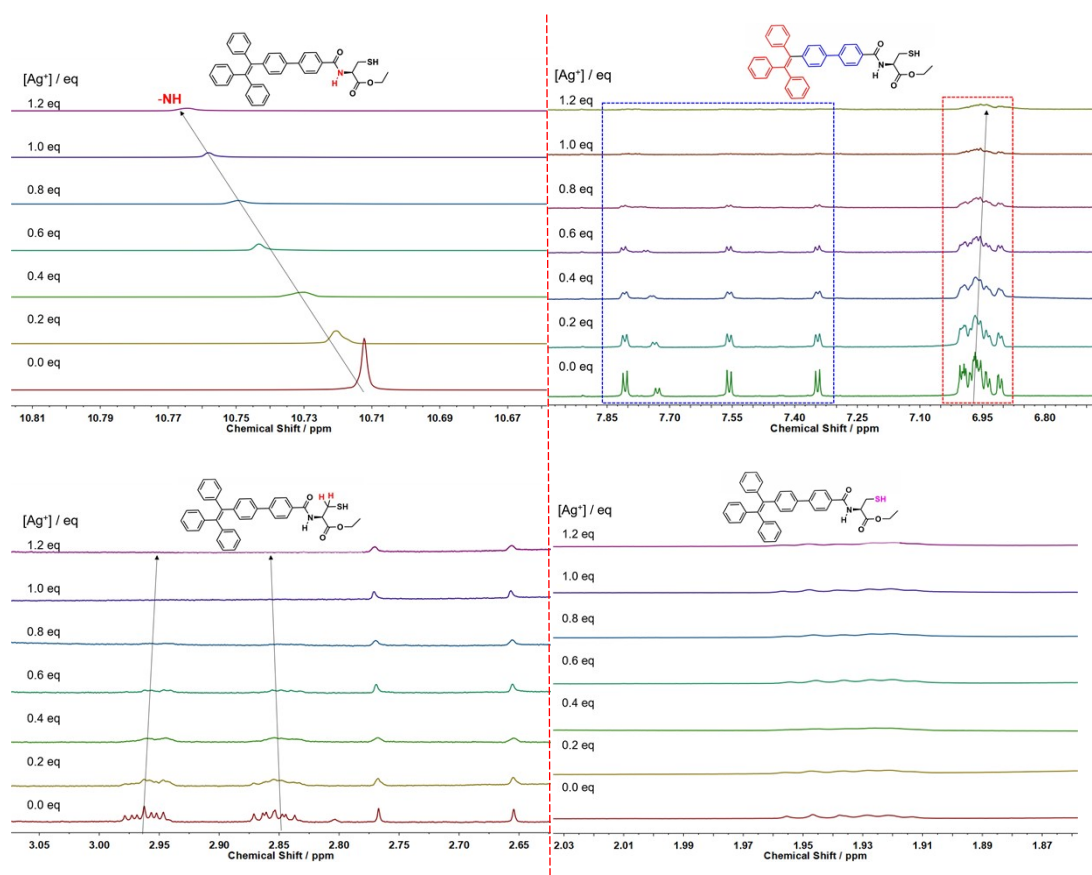

**Fig. S5** Partial <sup>1</sup>H NMR spectra of L-1 in THF-*d*<sub>8</sub> in the presence of Ag<sup>+</sup>. [L-1] = 25 μM, [Ag<sup>+</sup>] = 0 - 30 μM.



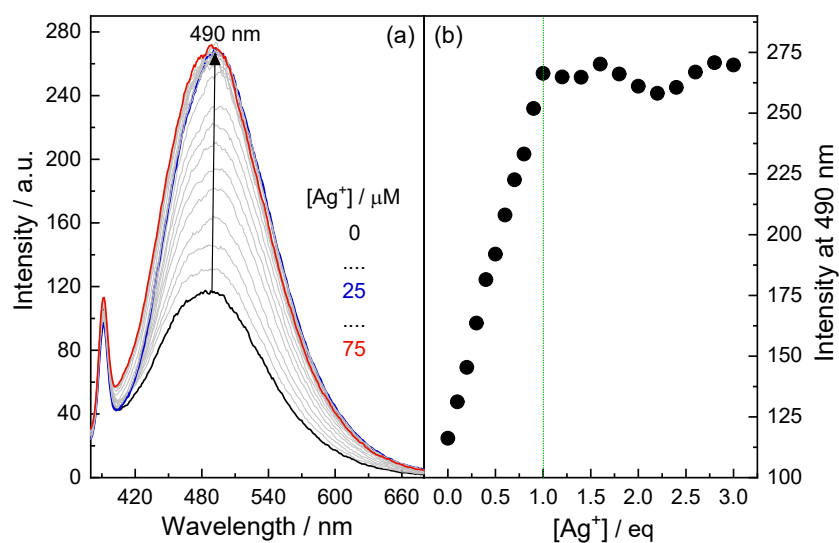

**Fig. S6** (a) Fluorescence spectra of D-1 in THF upon titration by Ag<sup>+</sup> and (b) plots of fluorescence intensity at 490 nm versus concentration of Ag<sup>+</sup>.  $\lambda_{\text{ex}} = 350 \text{ nm}$ ,  $[\text{D-1}] = 25 \text{ } \mu\text{M}$ ,  $[\text{Ag}^+] = 0 - 75 \text{ } \mu\text{M}$ .

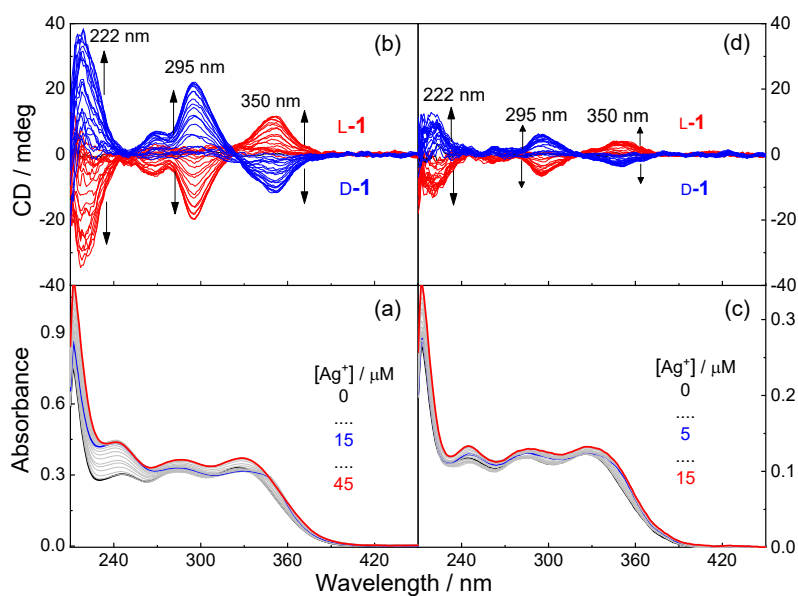

**Fig. S7** Absorption (a, c) and CD (b, d) spectra of L-/D-1 in THF in the presence of Ag<sup>+</sup> of increasing concentration.  $[\text{L-1}] = [\text{D-1}] = 15 \text{ } \mu\text{M}$  (a, b),  $5 \text{ } \mu\text{M}$  (c, d).

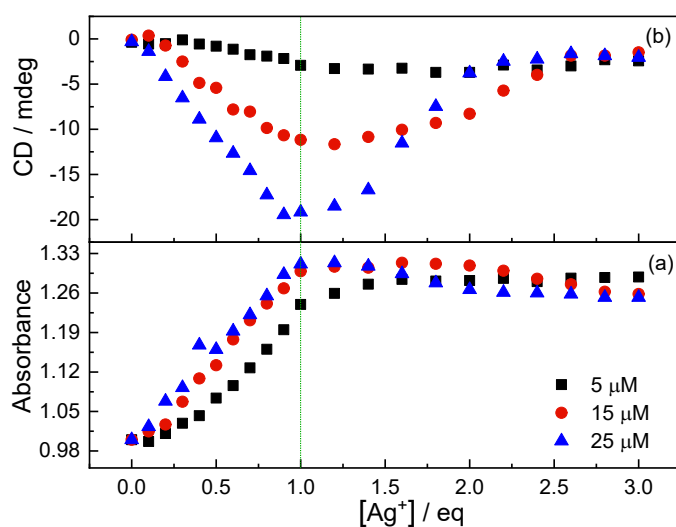

**Fig. S8** Plots of enhancement in absorbance (a) and CD signal (b) of D-1 at 350 nm in THF against concentration of  $\text{Ag}^+$ .  $[\text{D-1}] = 5 \mu\text{M}, 15 \mu\text{M}, 25 \mu\text{M}$ ,  $[\text{Ag}^+] = 0 - 75 \mu\text{M}$ .

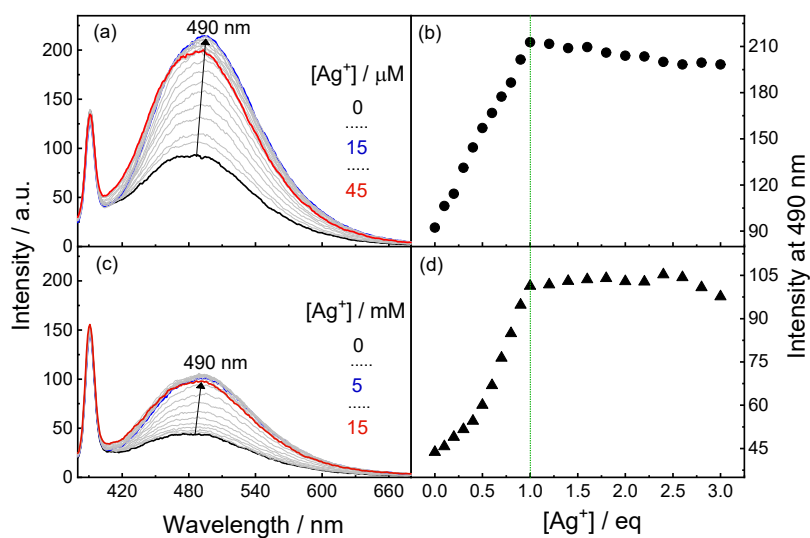

**Fig. S9** Fluorescence spectra of D-1 (a, c) in THF in the presence of  $\text{Ag}^+$  and plots of fluorescence intensity at 490 nm (b, d) versus concentration of  $\text{Ag}^+$ .  $\lambda_{\text{exc}} = 350 \text{ nm}$ ;  $[\text{D-1}] = 15 \mu\text{M}$  (a, b),  $5 \mu\text{M}$  (c, d).

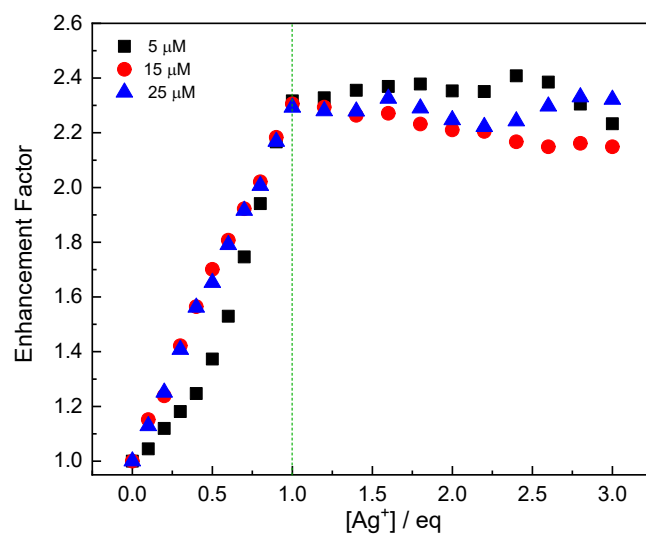

**Fig. S10** Enhancement of fluorescence intensity at 490 nm of D-1 in THF by Ag<sup>+</sup> of increasing concentration. [D-1] = 5 μM, 15 μM, 25 μM, [Ag<sup>+</sup>] = 0 - 75 μM.

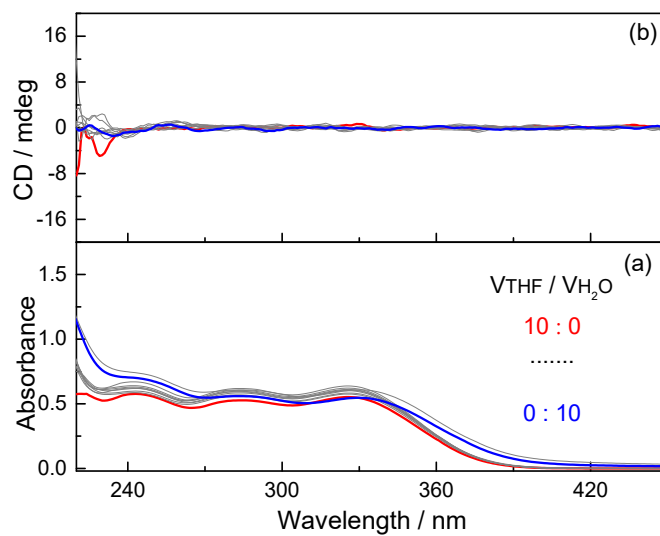

**Fig. S11** Absorption (a) and CD (b) spectra of D-1 in THF containing varying content of water. [D-1] = 25 μM.

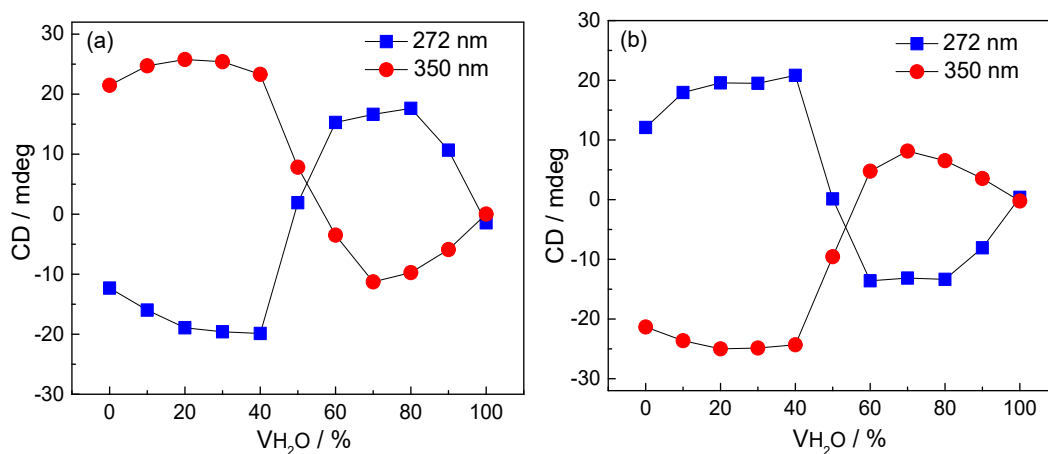

**Fig. S12** CD signals at 272 nm and 350 nm of Ag<sup>+</sup>-L-1 (a) and Ag<sup>+</sup>-D-1 (b) in THF containing increasing water content. [Ag<sup>+</sup>-L-1] = [Ag<sup>+</sup>-D-1] = 25 μM.

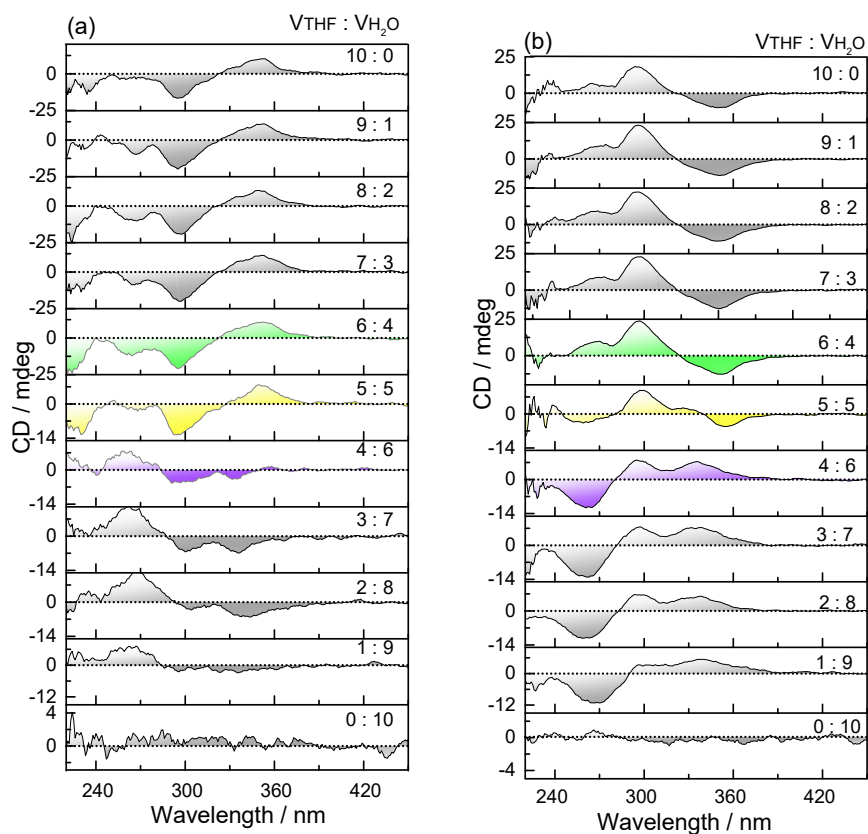

**Fig. S13** Traces of CD spectra of Ag<sup>+</sup>-L-1 (a) and Ag<sup>+</sup>-D-1 (b) coordination polymers in THF containing increasing fraction by volume water. [Ag<sup>+</sup>-L-1] = [Ag<sup>+</sup>-D-1] = 15 μM.

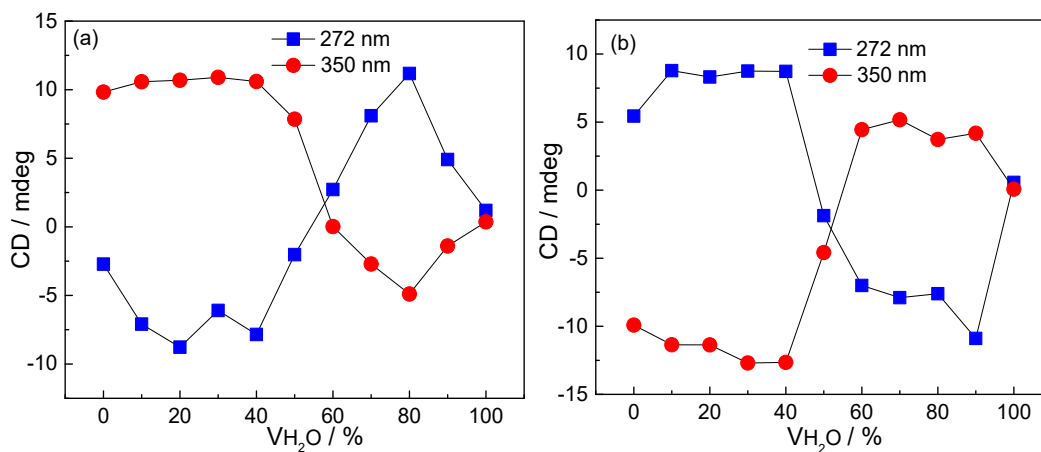

**Fig. S14** CD signals at 272 nm and 350 nm of  $\text{Ag}^+\text{-L-1}$  (a) and  $\text{Ag}^+\text{-D-1}$  (b) coordination polymers in THF containing increasing fraction by volume water.  $[\text{Ag}^+\text{-L-1}] = [\text{Ag}^+\text{-D-1}] = 15 \mu\text{M}$ .

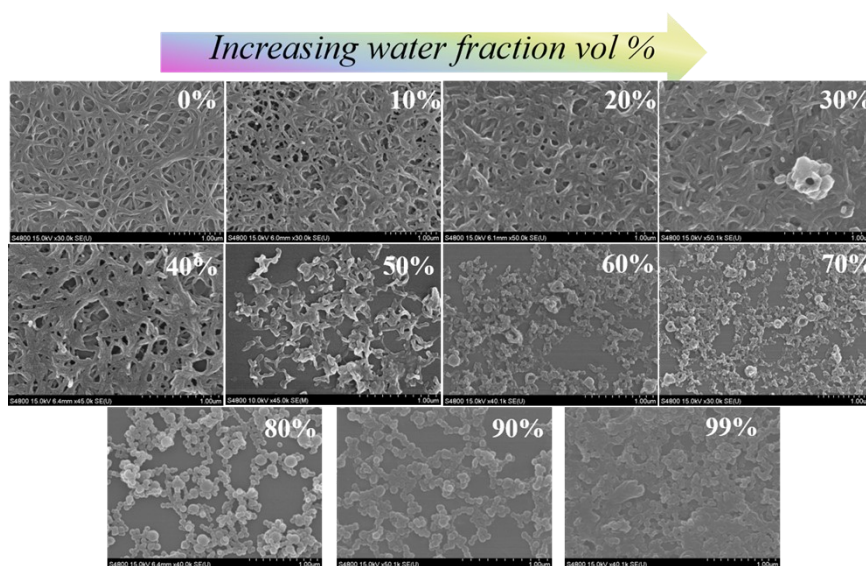

**Fig. S15** SEM images of  $\text{Ag}^+\text{-D-1}$  coordination polymers formed in  $\text{H}_2\text{O}/\text{THF}$  of increasing water volume fraction.  $[\text{Ag}^+\text{-D-1}] = 25 \mu\text{M}$ .

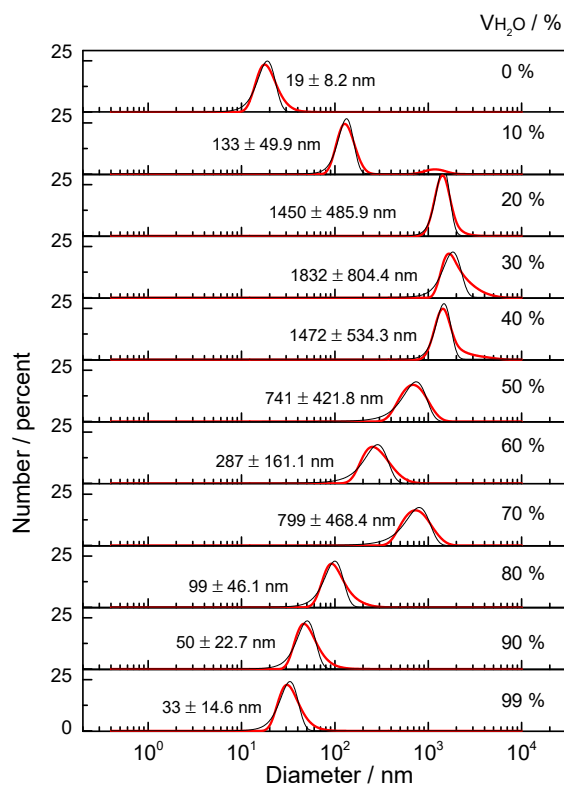

**Fig. S16** DLS size distribution of  $\text{Ag}^+$ -D-1 coordination polymers in  $\text{H}_2\text{O}/\text{THF}$  mixture of increasing water volume fraction.  $[\text{Ag}^+\text{-D-1}] = 25 \mu\text{M}$ .

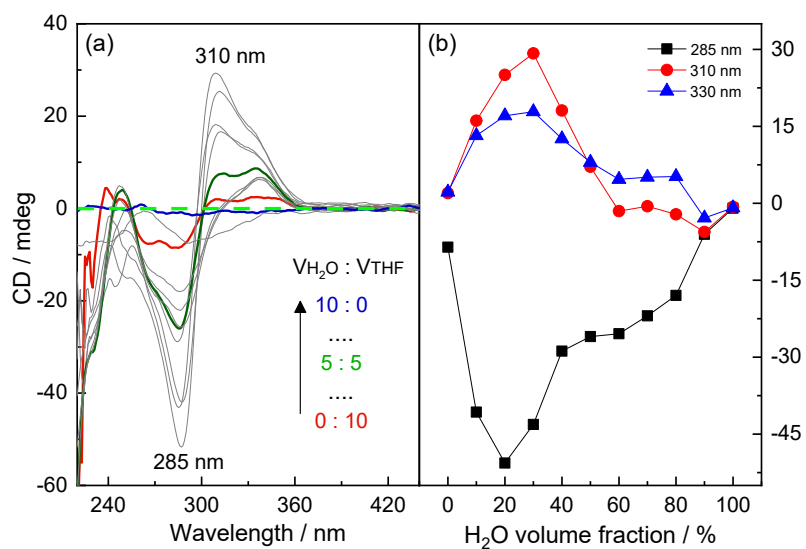

**Fig. S17** (a) CD spectra and (b) plots of CD signals of  $\text{Ag}^+$ -L-2 coordination polymers in  $\text{H}_2\text{O}/\text{THF}$  of varying water volume fraction.  $[\text{Ag}^+\text{-L-2}] = 25 \mu\text{M}$ .

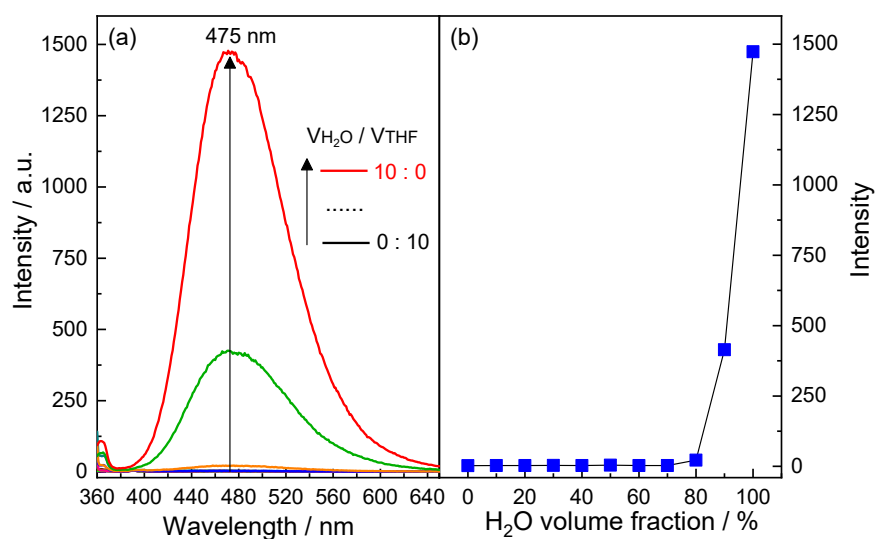

**Fig. S18** (a) Fluorescence spectra of L-2 in H<sub>2</sub>O/THF binary solvent of varying volume ratio and (b) plots of fluorescence intensity at 475 nm of L-2 versus water volume fraction.  $\lambda_{\text{ex}} = 350 \text{ nm}$ ,  $[\text{L-2}] = 25 \mu\text{M}$ .

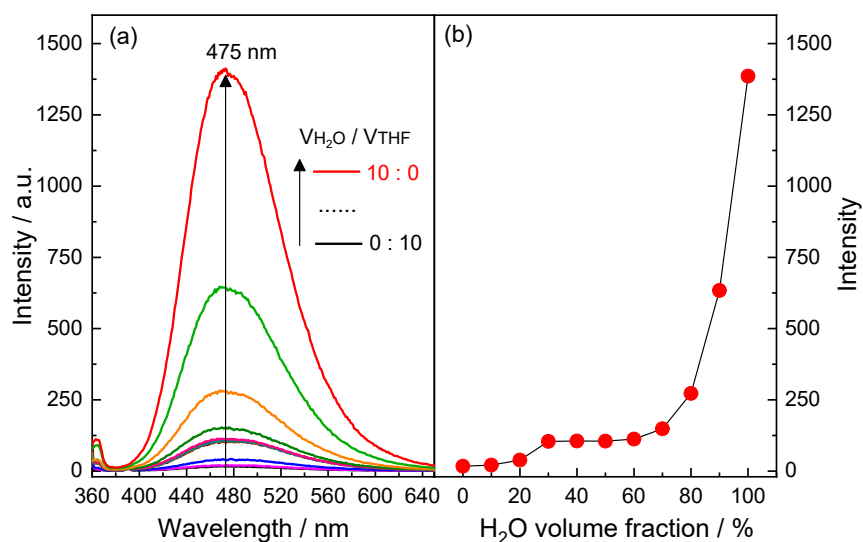

**Fig. S19** (a) Fluorescence spectra of Ag<sup>+</sup>-L-2 coordination polymers in H<sub>2</sub>O/THF binary solvent of varying volume ratio and (b) plots of fluorescence intensity at 475 nm of Ag<sup>+</sup>-L-2 versus water volume fraction.  $\lambda_{\text{ex}} = 350 \text{ nm}$ ,  $[\text{Ag}^+\text{-L-2}] = 25 \mu\text{M}$ .

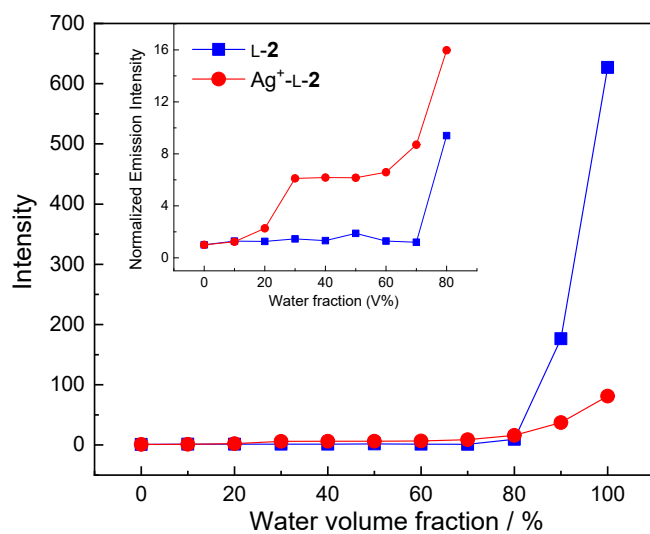

**Fig. S20** Fluorescence intensity of L-2 (blue square) and Ag<sup>+</sup>-L-2 coordination polymer (red dot) at 475 nm in THF containing water of varying volume fraction. Inset shows fluorescence intensity enhancement factor as a function of water volume fraction in H<sub>2</sub>O/THF.  $\lambda_{\text{ex}} = 350 \text{ nm}$ ,  $[\text{L-2}] = [\text{Ag}^+\text{-L-2}] = 25 \mu\text{M}$ .

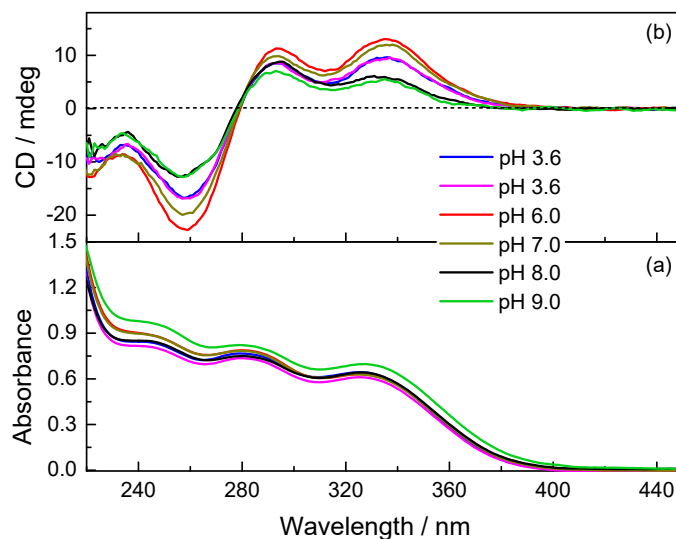

**Fig. S21** Absorption (a) and CD spectra (b) of Ag<sup>+</sup>-D-1 coordination polymers in 3:7 (v/v) THF/H<sub>2</sub>O binary mixtures of varying pH.  $[\text{Ag}^+\text{-D-1}] = 25 \mu\text{M}$ .



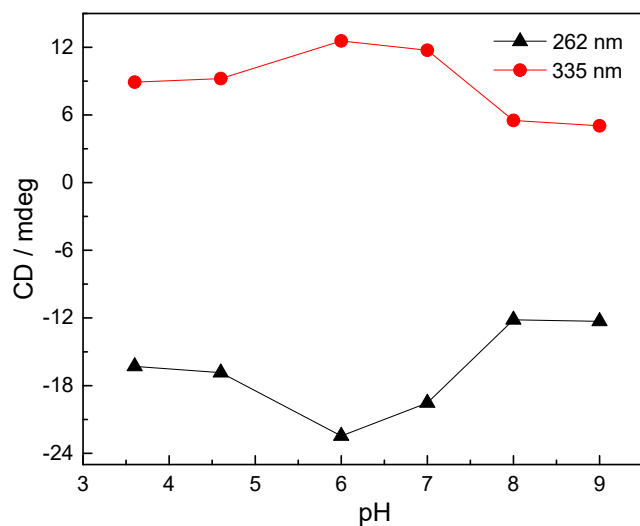

**Fig. S22** Plots of CD signals of  $\text{Ag}^+\text{-D-1}$  coordination polymers in 3:7 (v/v) THF/ $\text{H}_2\text{O}$  binary mixture against pH.  $[\text{Ag}^+\text{-D-1}] = 25 \mu\text{M}$ .

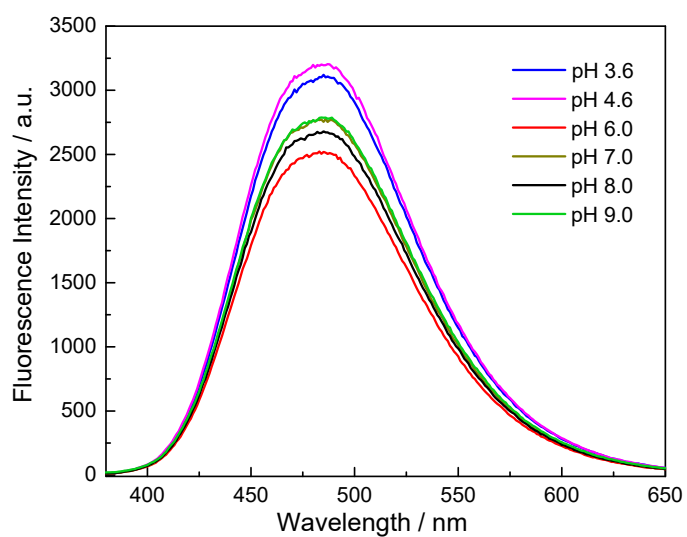

**Fig. S23** pH-dependent emission spectra of  $\text{Ag}^+\text{-D-1}$  coordination polymers in 3:7 (v/v) THF/ $\text{H}_2\text{O}$  binary mixtures of varying pH. Excitation wavelength is 350 nm;  $[\text{Ag}^+\text{-D-1}] = 25 \mu\text{M}$ .

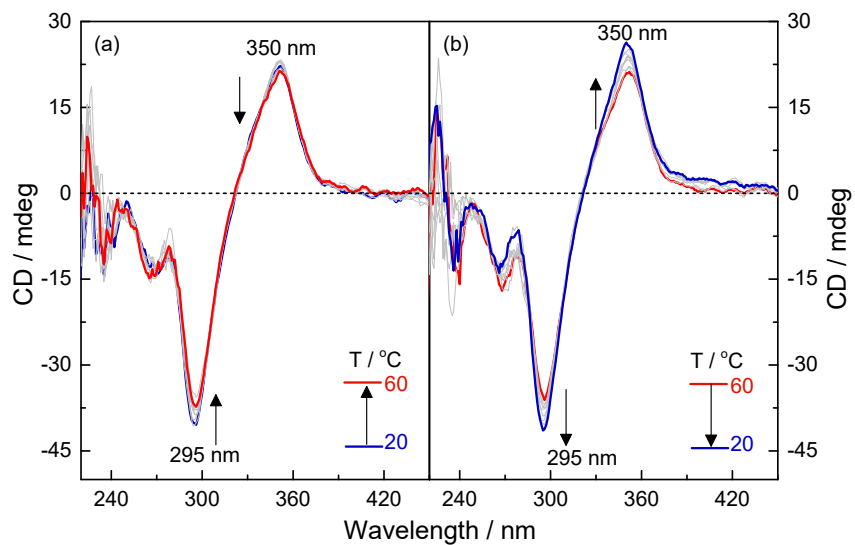

**Fig. S24** Temperature-dependent CD spectra of  $\text{Ag}^+$ -L-1 coordination polymers in THF upon heating (a) and later cooling (b).  $[\text{Ag}^+] = [\text{L-1}] = 25 \mu\text{M}$ .

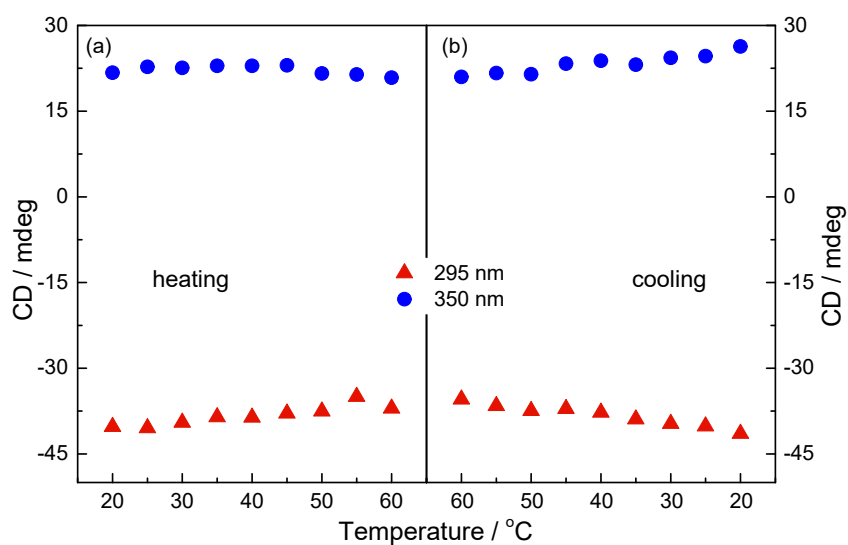

**Fig. S25** Plots of CD signals at 295 nm and 350 nm of  $\text{Ag}^+$ -L-1 coordination polymers in THF against temperature.  $[\text{Ag}^+] = [\text{L-1}] = 25 \mu\text{M}$ .

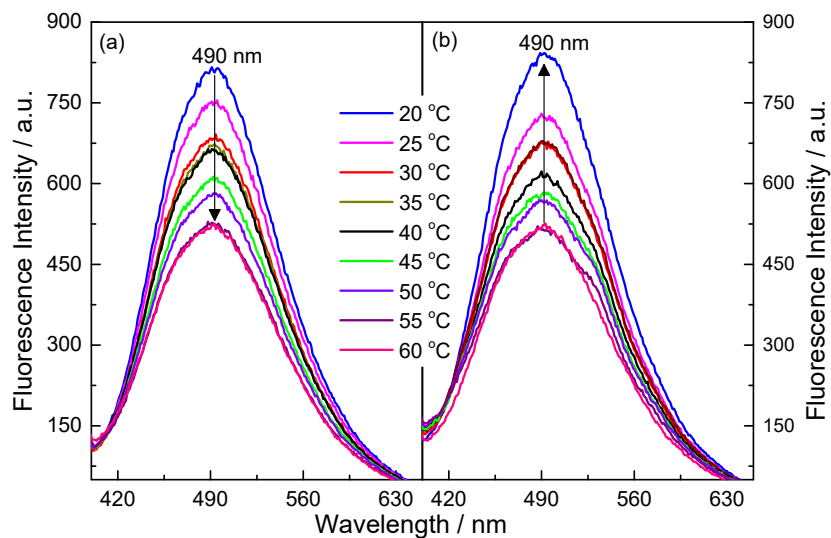

**Fig. S26** Temperature-dependent fluorescence spectra of  $\text{Ag}^+$ -**L-1** coordination polymers in THF upon heating (a) and later cooling (b).  $\lambda_{\text{exc}} = 350 \text{ nm}$ ,  $[\text{Ag}^+] = [\text{L-1}] = 25 \mu\text{M}$ .

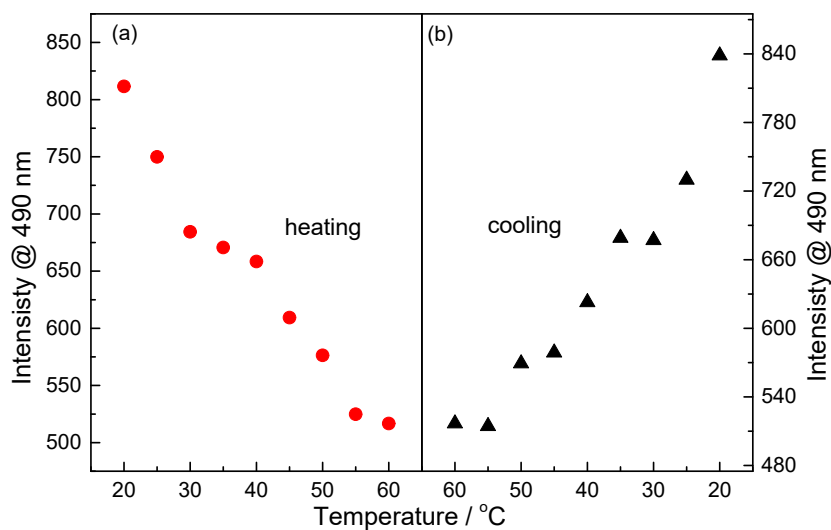

**Fig. S27** Plots of emission intensity at 490 nm of  $\text{Ag}^+$ -**L-1** coordination polymers in THF against temperature.  $\lambda_{\text{exc}} = 350 \text{ nm}$ ,  $[\text{Ag}^+] = [\text{L-1}] = 25 \mu\text{M}$ .

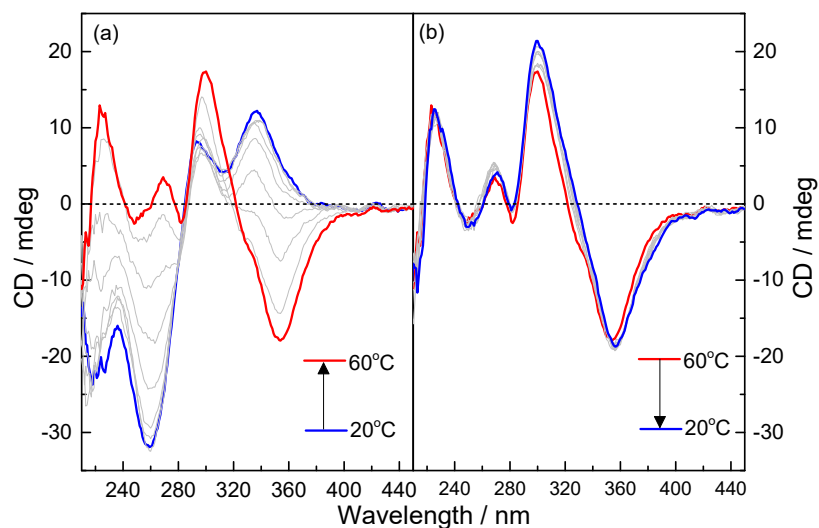

**Fig. S28** Temperature-dependent CD spectra of  $\text{Ag}^+$ -D-1 coordination polymers in 3:7 (v/v) THF/ $\text{H}_2\text{O}$  upon heating (a) and later cooling (b).  $[\text{Ag}^+] = [\text{D-1}] = 25 \mu\text{M}$ .

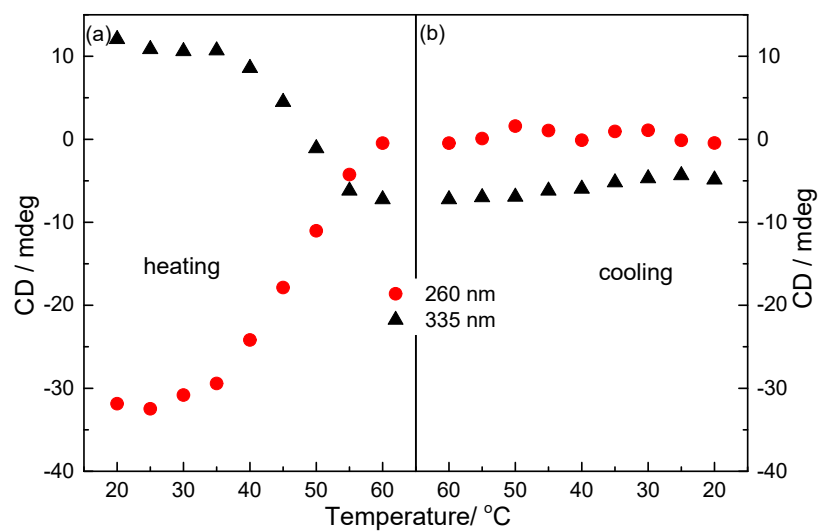

**Fig. S29** Plots of CD signals at 260 nm and 335 nm of  $\text{Ag}^+$ -D-1 coordination polymers in 3:7 (v/v) THF/ $\text{H}_2\text{O}$  against temperature.  $[\text{Ag}^+] = [\text{D-1}] = 25 \mu\text{M}$ .

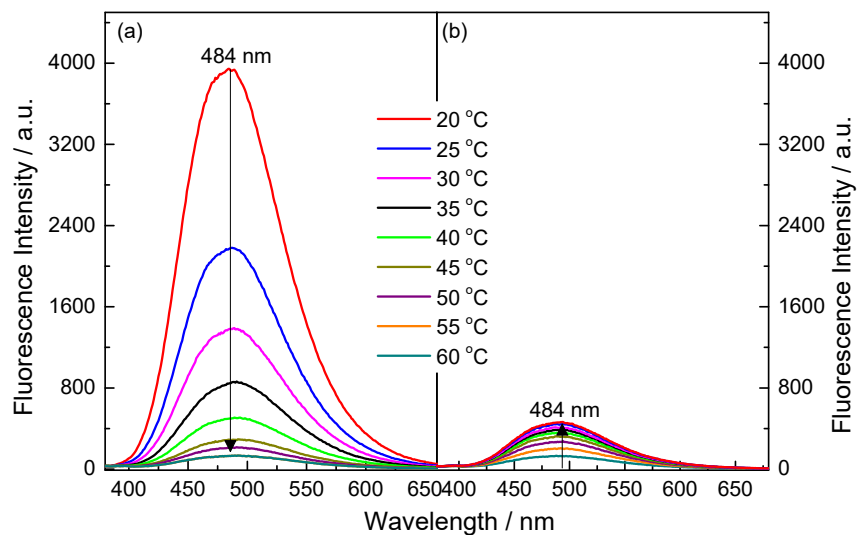

**Fig. S30** Temperature-dependent fluorescence spectra of  $\text{Ag}^+$ -L-1 coordination polymers in 3:7 (v/v) THF/ $\text{H}_2\text{O}$  upon heating (a) and later cooling (b).  $\lambda_{\text{ex}} = 350 \text{ nm}$ ,  $[\text{Ag}^+] = [\text{L-1}] = 25 \mu\text{M}$ .

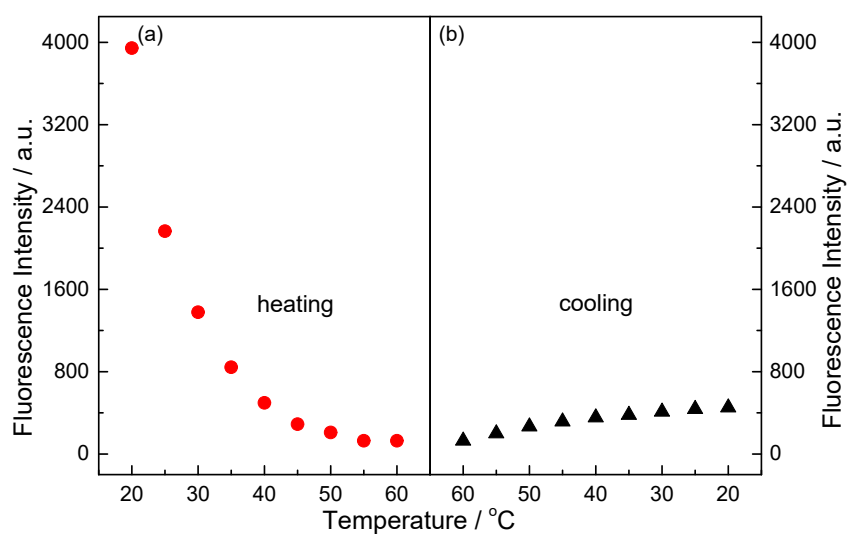

**Fig. S31** Plots of emission intensity at 484 nm of  $\text{Ag}^+$ -L-1 coordination polymers in 3:7 (v/v) THF/ $\text{H}_2\text{O}$  against temperature.  $\lambda_{\text{ex}} = 350 \text{ nm}$ ,  $[\text{Ag}^+] = [\text{L-1}] = 25 \mu\text{M}$ .

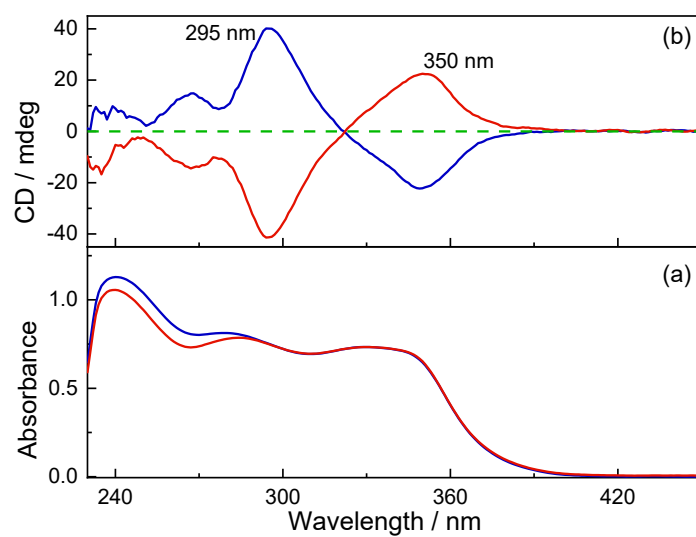

**Fig. S32** Absorption (a) and CD (b) spectra of  $\text{Ag}^+\text{-L-1}$  (red) and  $\text{Ag}^+\text{-D-1}$  (blue) coordination polymers in THF.  $[\text{Ag}^+] = [\text{L-/D-1}] = 25 \mu\text{M}$ .

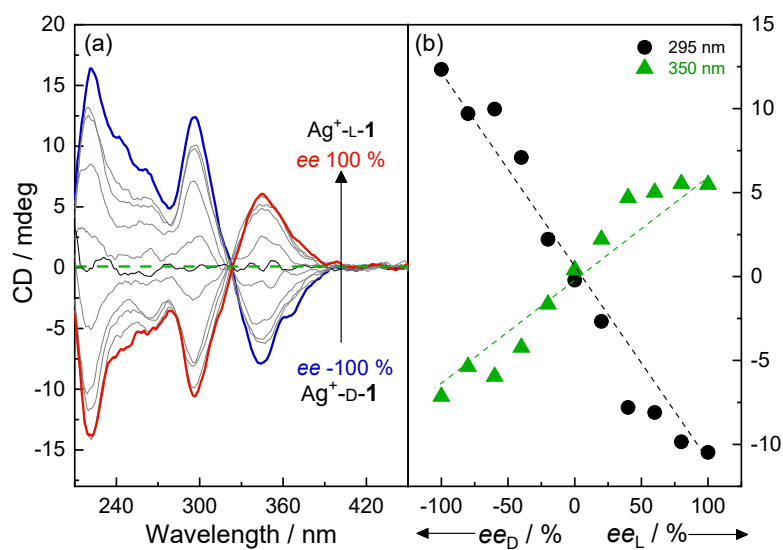

**Fig. S33** (a) CD spectra of  $\text{Ag}^+\text{-1}$  coordination polymers in  $\text{CH}_3\text{CN}$  of varying  $ee$  of **1** and (b) plots of CD signals at 295 nm and 350 nm versus  $ee$ .  $[\text{Ag}^+] = 25 \mu\text{M}$ ,  $[\text{L-1}] + [\text{D-1}] = 25 \mu\text{M}$ .

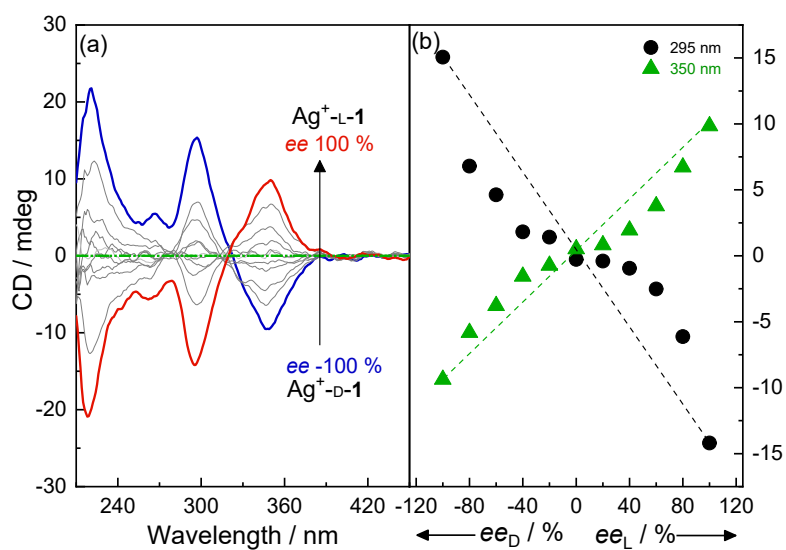

**Fig. S34** (a) CD spectra of  $\text{Ag}^+$ -**1** coordination polymers in  $\text{CH}_3\text{OH}$  of varying  $ee$  of **1** and (b) plots of CD signals at 295 nm and 350 nm versus  $ee$ .  $[\text{Ag}^+] = 25 \mu\text{M}$ ,  $[\text{L-1}] + [\text{D-1}] = 25 \mu\text{M}$ .

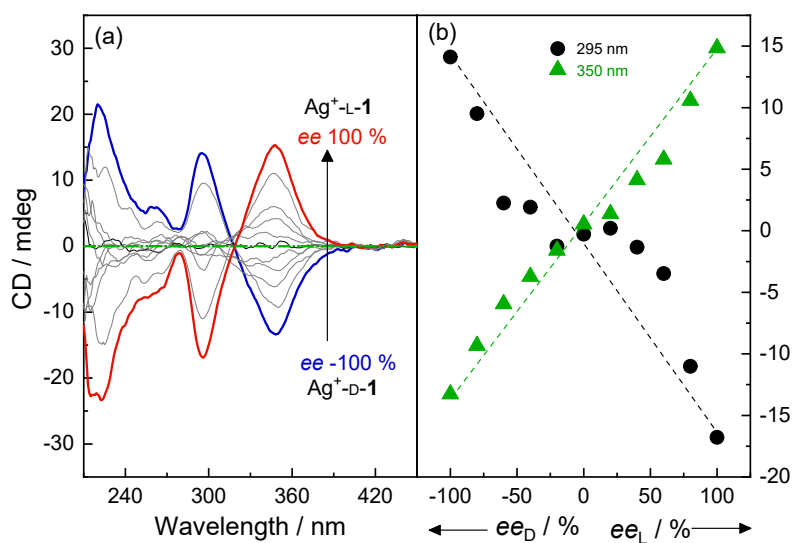

**Fig. S35** (a) CD spectra of  $\text{Ag}^+$ -**1** coordination polymers in  $\text{C}_2\text{H}_5\text{OH}$  of varying  $ee$  of **1** and (b) plots of CD signals at 295 nm and 350 nm versus  $ee$ .  $[\text{Ag}^+] = 25 \mu\text{M}$ ,  $[\text{L-1}] + [\text{D-1}] = 25 \mu\text{M}$ .

### S3.2 $^1\text{H}$ NMR and $^{13}\text{C}$ NMR Spectra and HRMS of New Compounds

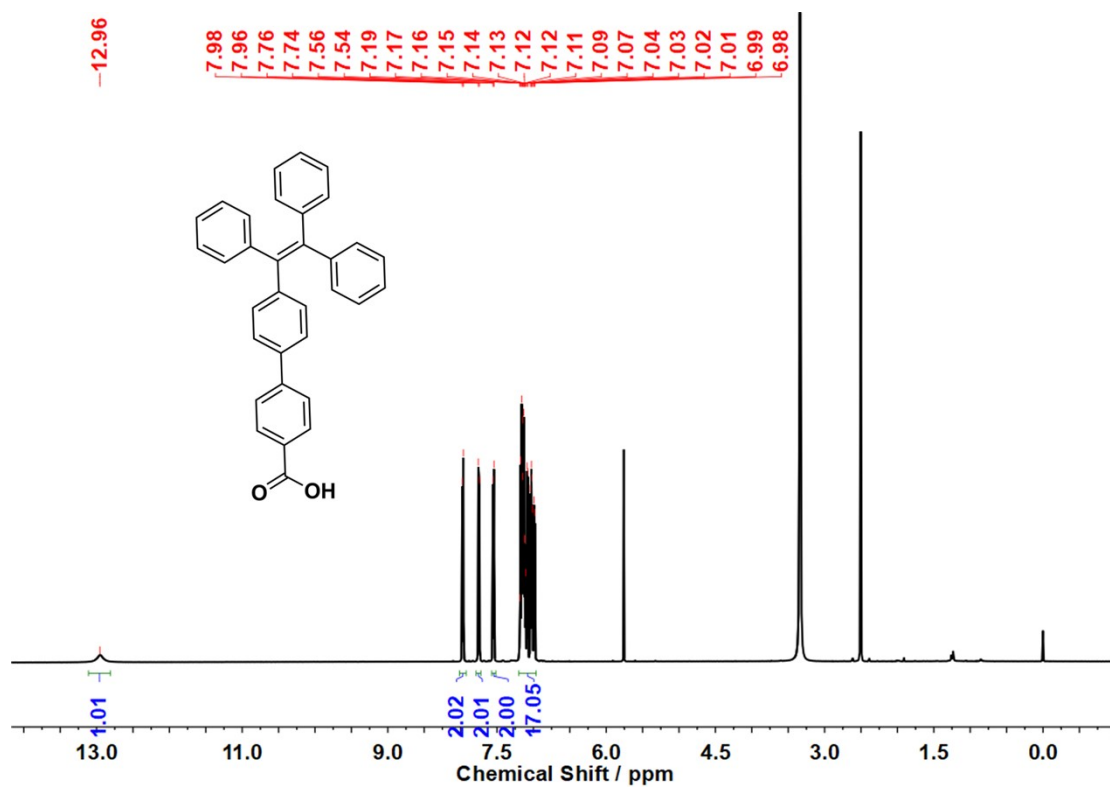

Fig. S36  $^1\text{H}$  NMR (600 MHz, DMSO- $d_6$ ) spectrum of TPE-Ph-COOH.

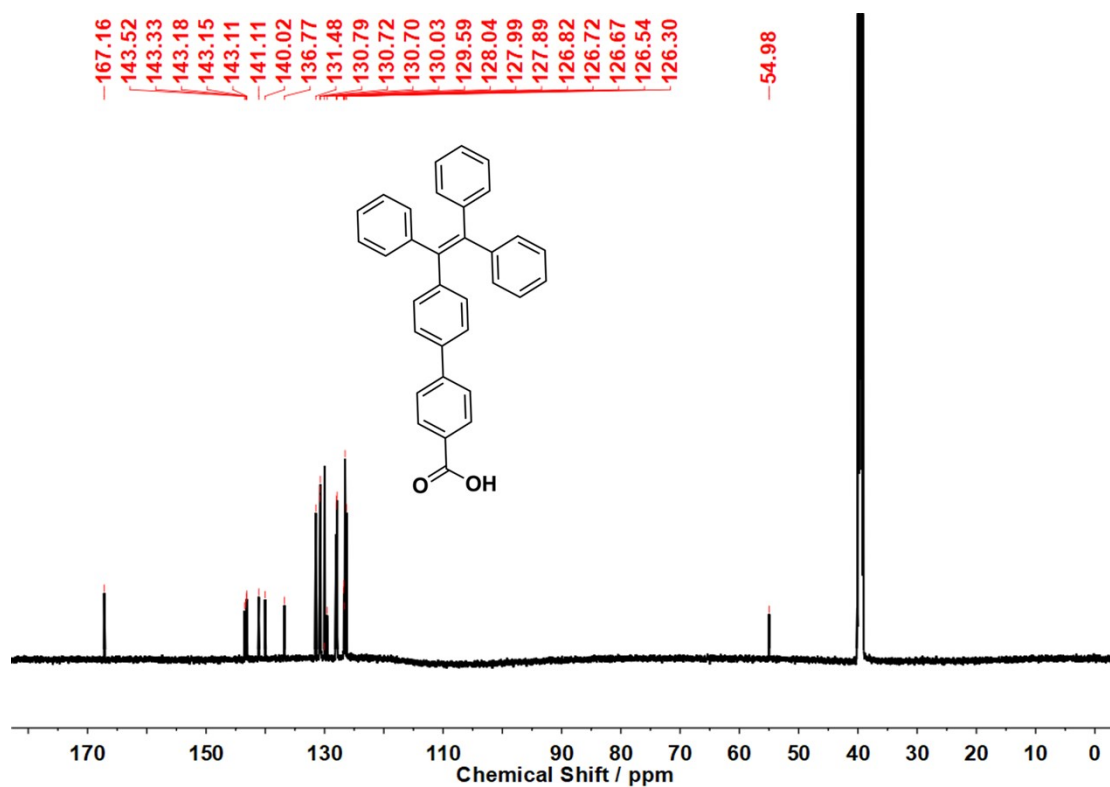

Fig. S37  $^{13}\text{C}$  NMR (151 MHz, DMSO- $d_6$ ) spectrum of TPE-Ph-COOH.



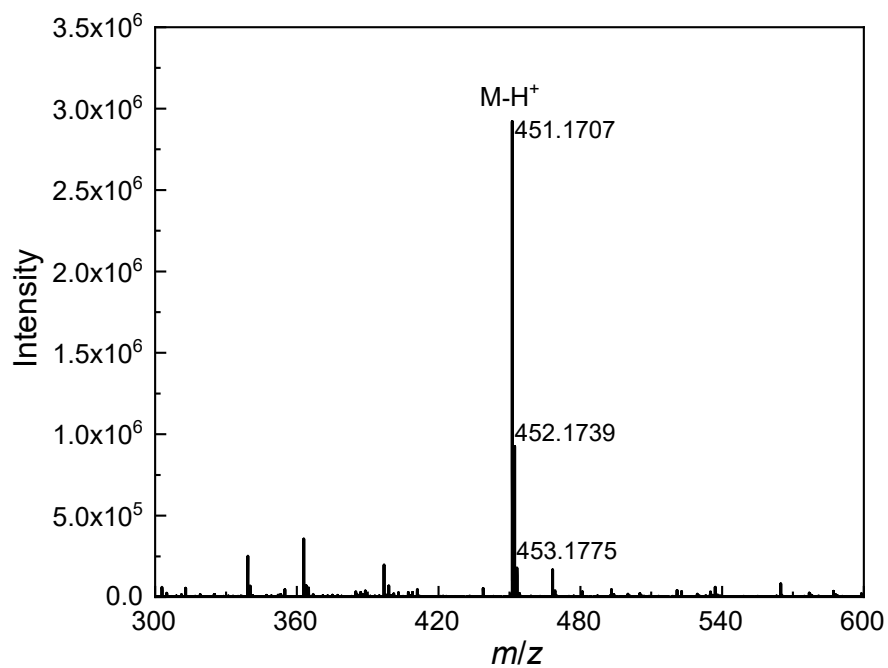

**Fig. S38** HRMS of TPE-Ph-COOH.

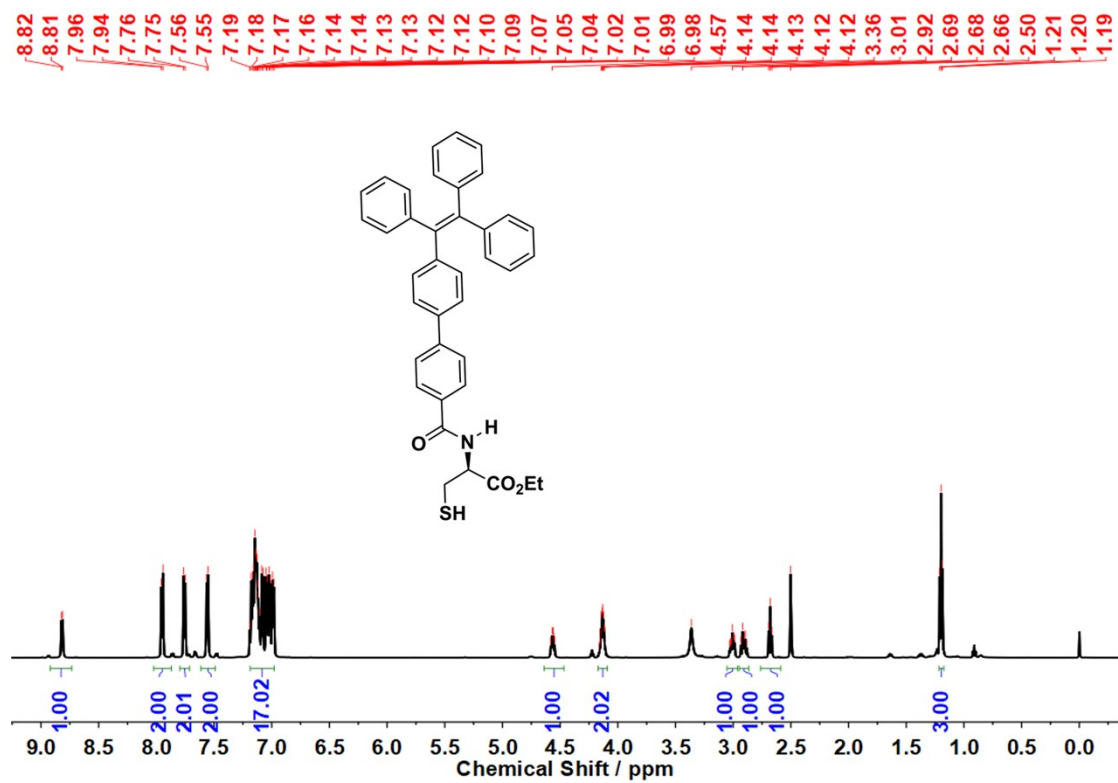

**Fig. S39**  $^1H$  NMR (600 MHz,  $DMSO-d_6$ ) spectrum of L-1.



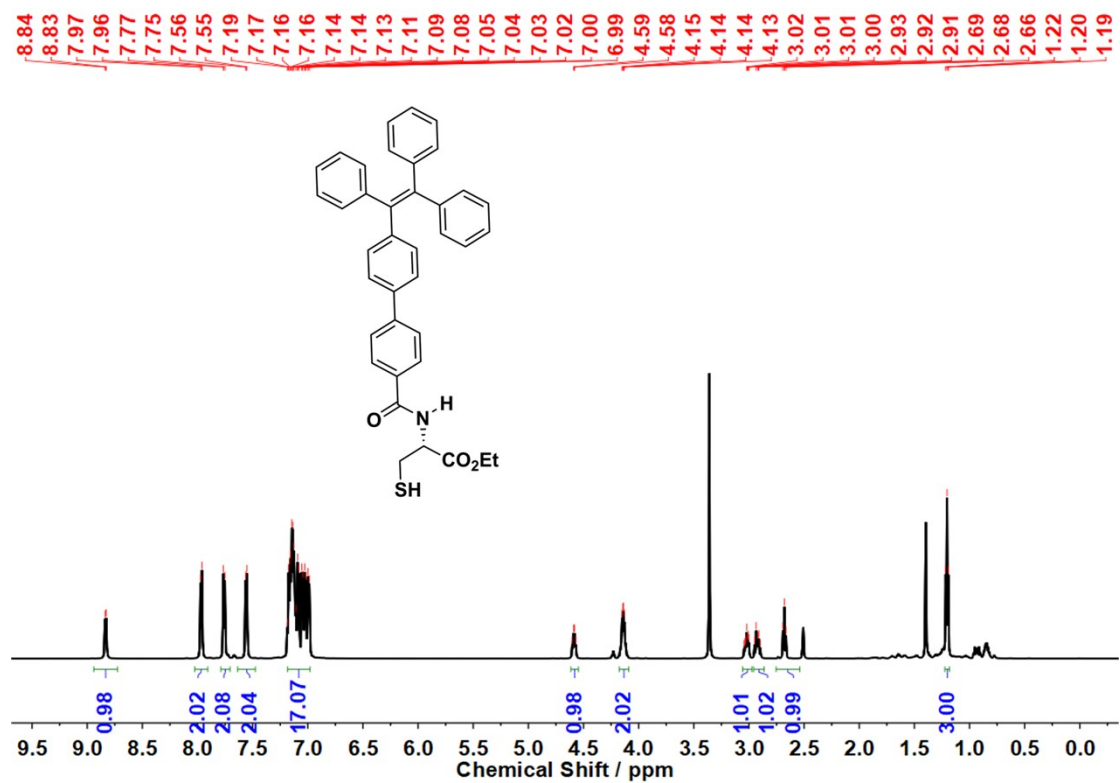

Fig. S42  $^1\text{H}$  NMR (600 MHz,  $\text{DMSO-}d_6$ ) spectrum of D-1.

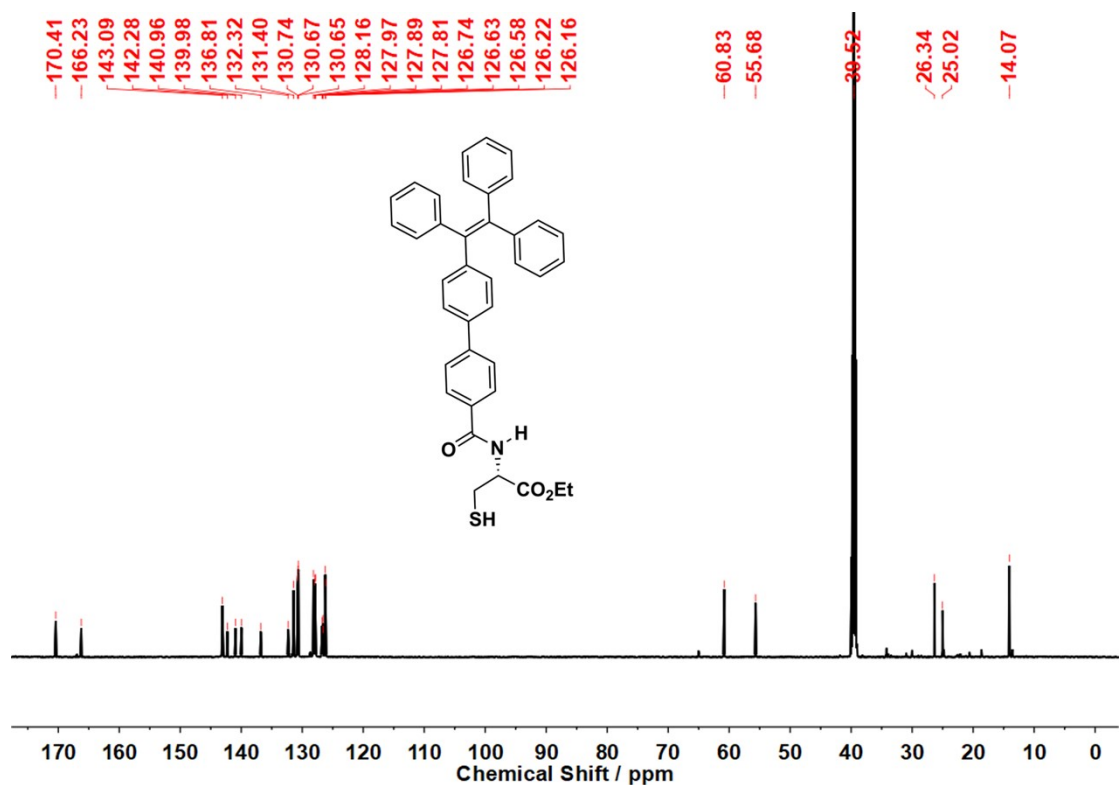

Fig. S43  $^{13}\text{C}$  NMR (151 MHz,  $\text{DMSO-}d_6$ ) spectrum of D-1.

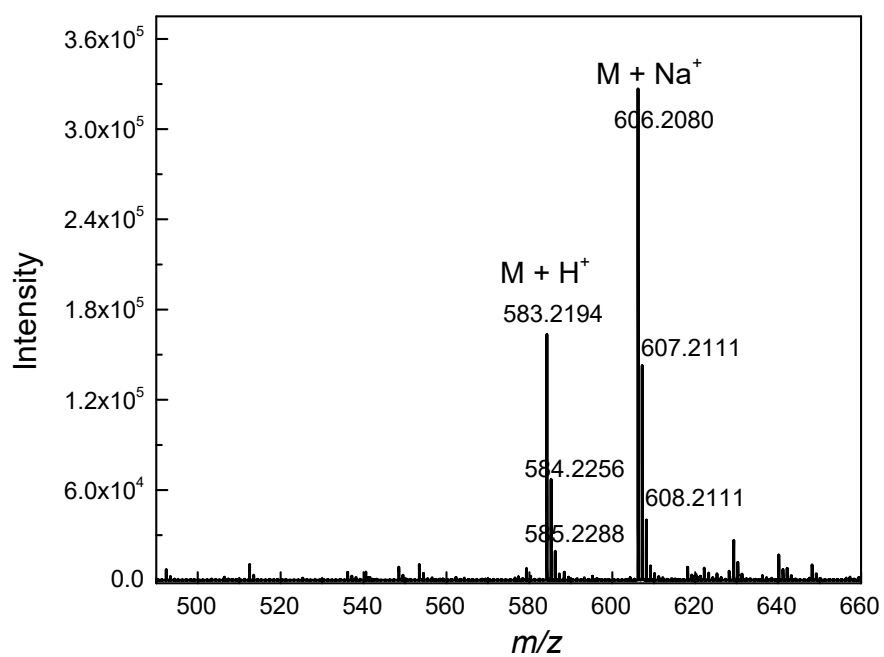

Fig. S44 HRMS of D-1.

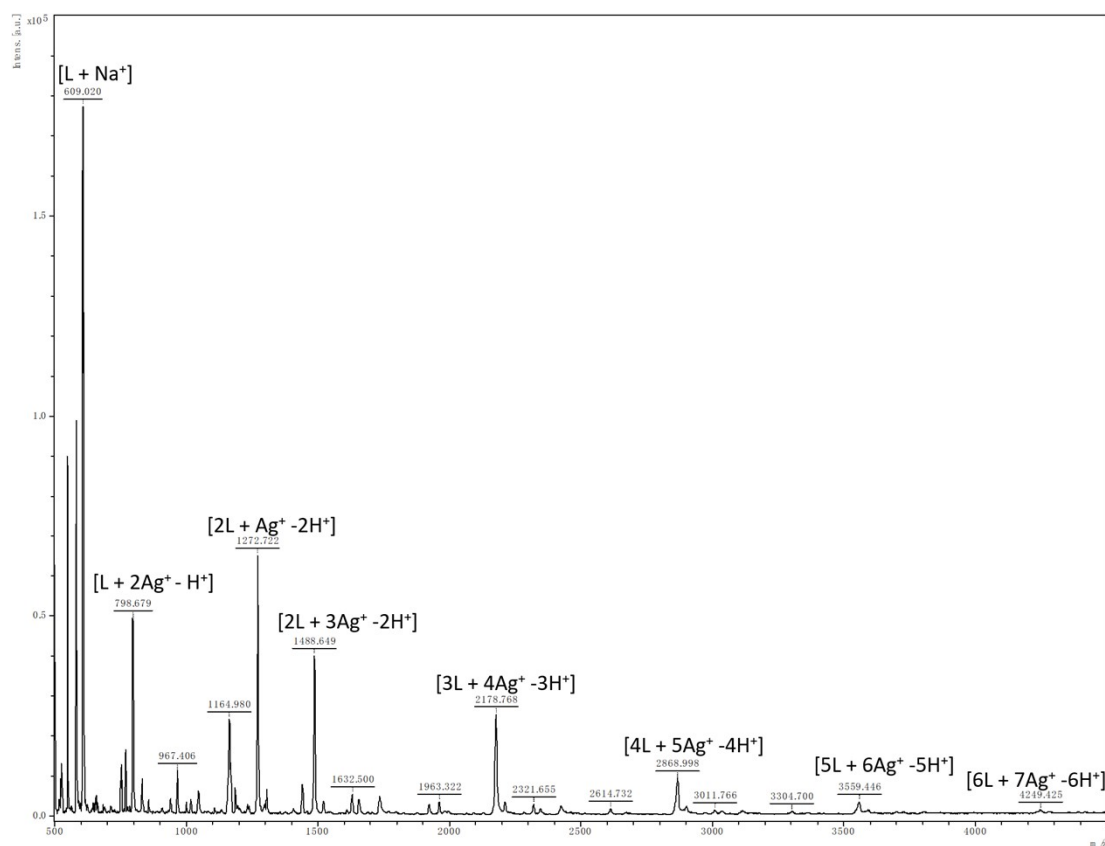

Fig. S45 MALDI-TOF MS of  $Ag^+$ -L-1 coordination polymer.
